# Supplementary material
Source: PubMed Central journal article supplement (PMC4046107)
Supplement: NIHMS58259-supplement-1.pdf [file NIHMS58259-supplement-1.pdf]

**Supplementary Figure 1 | Cereal species studied.** The cereals studied included pre-domestication species (rye, *Secale cereale*; wild barley, *Hordeum spontaneum* and wild einkorn, *Triticum boeoticum*) together with another four cereals considered as domesticated (einkorn, *Triticum monococcum*; emmer, *Triticum dicoccum*; naked wheat, *Triticum aestivum/durum* and barley, *Hordeum vulgare* subsp. *distichum*).

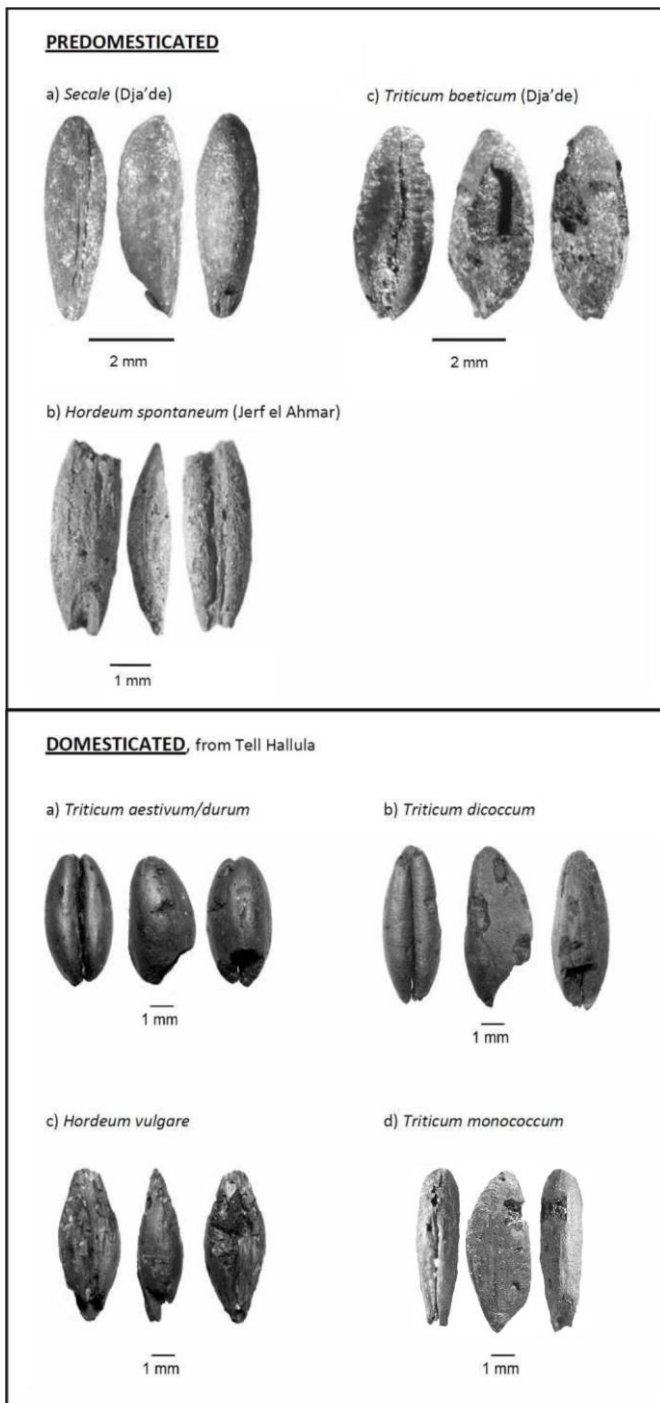

**Supplementary Figure 2 | Relationships between  $\Delta^{13}\text{C}$  in barley (left figures) and wheat (right figures) kernels and *Quercus* (upper) and *Pistacia* (lower) charcoals.** Each value represents the mean  $\pm$  SE of kernels and charcoal samples from a specific site and dating. The dashed line indicates the 1:1 reference line.

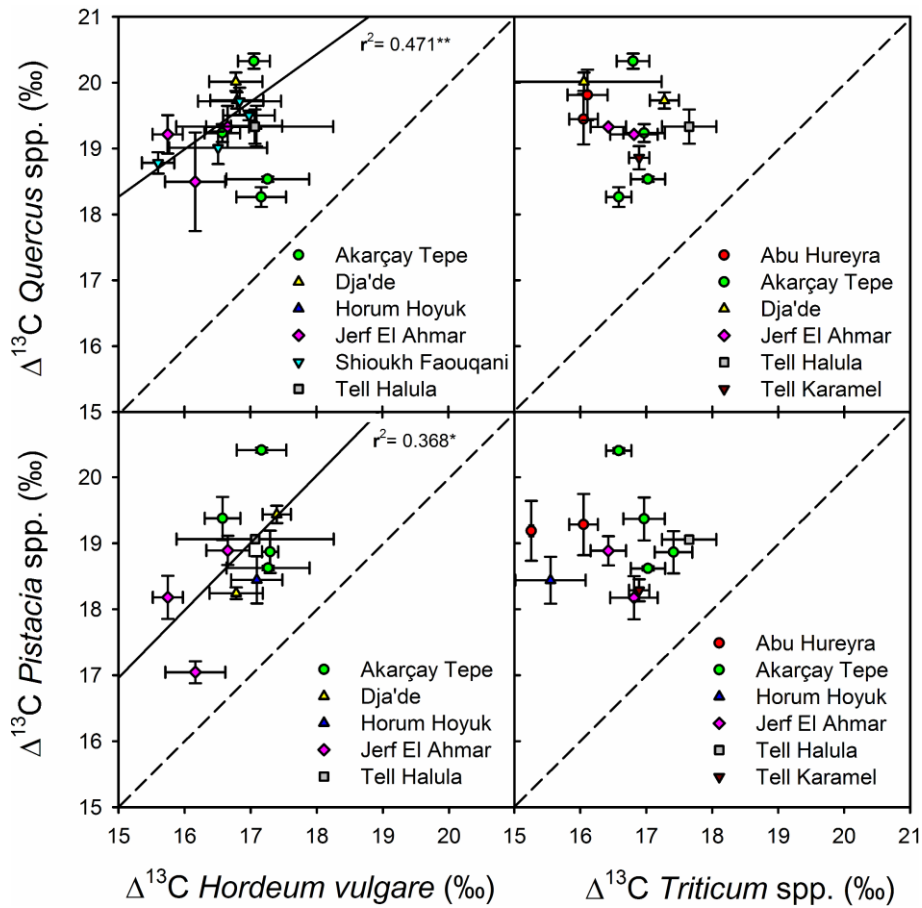

**Supplementary Figure 3 | Relationship between  $\Delta^{13}\text{C}$  in barley and wheat kernels.** Each value represents the mean  $\pm$  SE of kernels samples from a specific site and dating. The dashed line indicates the 1:1 reference line.

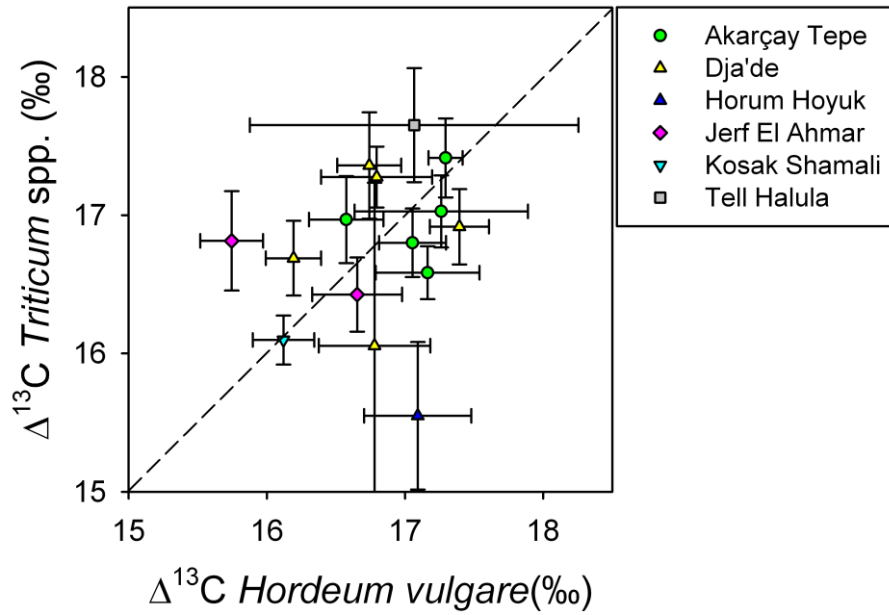

**Supplementary Figure 4 | Relative water inputs during grain filling (Past/Present).** The trend line depicts a locally weighted least-squares regression curve (LOESS) fitted to the data. Each value represents the mean  $\pm$  SE of kernels from a particular species, site and dating. Water input in the past was estimated from  $\Delta^{13}\text{C}$  values of charred kernels recovered at 11 different sites (supplementary Table 1). The horizontal line refers to the present-day average water input for rainfed barley and wheat in the region (calculated as the total precipitation accumulated during April and the first half of May).

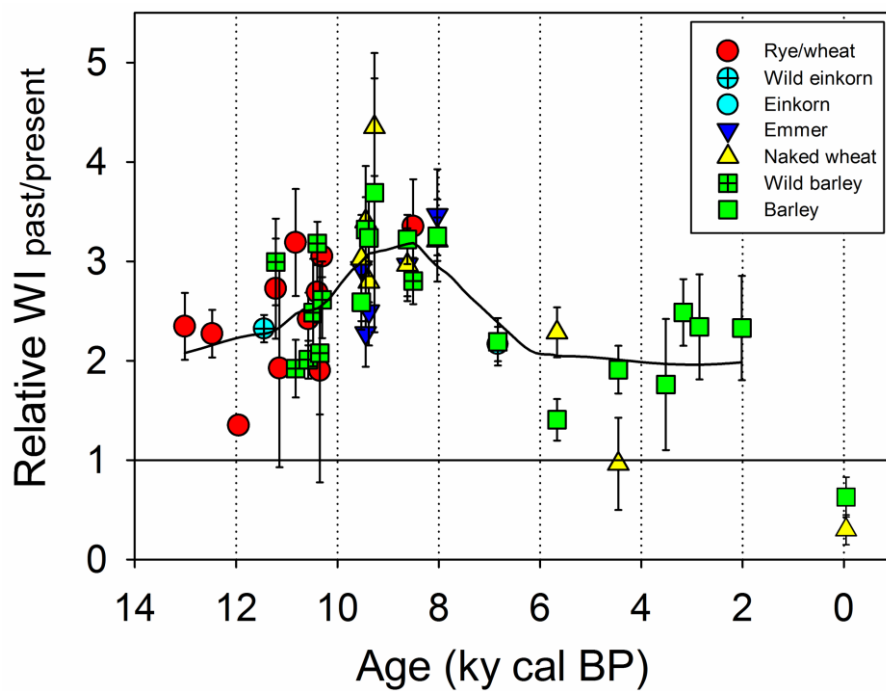

**Supplementary Figure 5 | Grain yield.** Evolution of grain yield (GY) of barley (*Hordeum vulgare* subsp. *distichum*) and naked wheat (*Triticum aestivum/durum*), as estimated from  $\Delta^{13}\text{C}$  (grey symbols), and corrected by the lower kernel weight values in the past than in the present (red and green symbols). Each value represents the mean  $\pm$  SE of kernels from a specific site and dating. Present time yields in the regions correspond to rainfed crops as detailed in the Methods section.

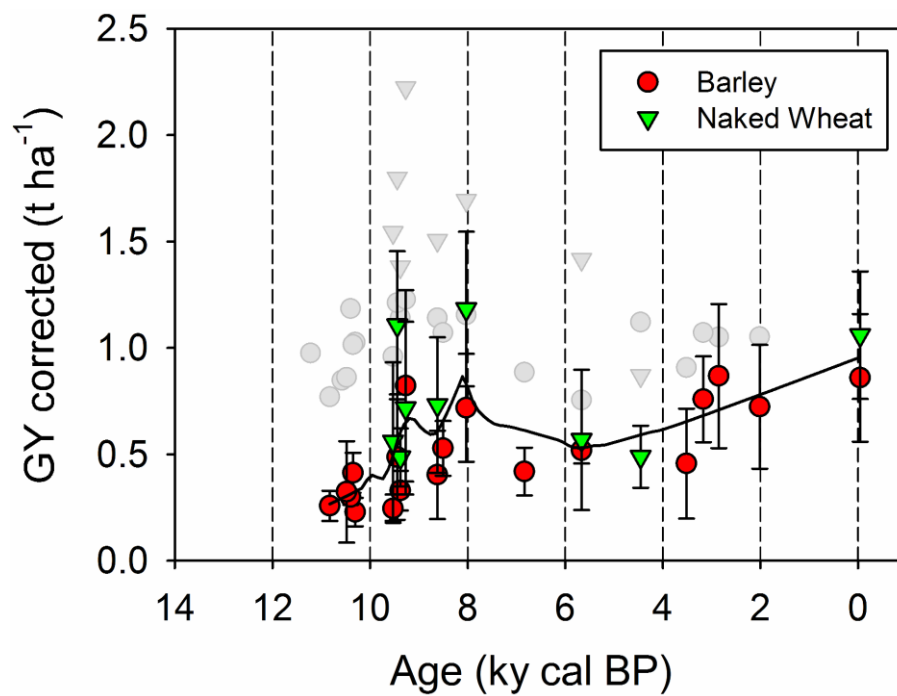

### Supplementary Note 1: Interspecific comparison of $\Delta^{13}\text{C}$ in modern samples

To investigate species co-occurrence patterns of  $\Delta^{13}\text{C}$ , subsets of modern samples of different species (either forest trees or cereals) that were found to co-occur in particular geographical settings were subjected to correlation analysis involving all pair-wise species combinations. The relationship between the  $\Delta^{13}\text{C}$  of *Quercus* and *Pistacia* was positive and significant ( $r = +0.59$ ). Similarly, the  $\Delta^{13}\text{C}$  records of *Hordeum vulgare* and *Triticum aestivum* were positively related ( $r = +0.97$ ). The tighter association between the  $\Delta^{13}\text{C}$  values of cereals agrees with the highly coincident temporal frames of grain filling for both species (April–May).

### Supplementary Note 2: $\Delta^{13}\text{C}$ in kernels as an indicator of crop water status in the past

The  $\Delta^{13}\text{C}$  values in plant remains of different crops from seven sites in northern Mesopotamia and the Levant support increased aridity from the Early Bronze Age (4700-4000 BP) to the Middle Bronze Age (4000 - 3600 BP)<sup>1</sup>. This trend is particularly evident in north Syria (the same area of our study) and is supported by other (more indirect) climate proxies<sup>2</sup>. Thus, while a relatively satisfactory water status can be recognized in the crop assemblages of Early Bronze Age sites, with the cultivation of numerous crops with comparatively high water requirements, the impact of the '4.2 ka event', with an increased aridity after 4,000 BP at the latest, is reflected strongly in the reduction or absence of drought-susceptible crop species in the Middle Bronze Age<sup>3</sup>. Similarly, results from the sites at Ebla and Qatna in Syria and Arslantepe in Turkey using stable carbon isotope records of plant remains also show one arid phase dating to the '4.2 ka event'<sup>4-6</sup>.

### Supplementary Note 3: Local variability in climate during the '4.2 ka event'

The '4.2 ka event' is one of the best investigated Holocene climate fluctuations, particularly in the Near East. However, there are numerous archaeological works emphasizing the local variability in climate effects in the region (e.g. upper vs. middle Euphrates). In regard of this, there is no definite confirmation for a widespread and distinct event at 4.2 ka cal BP; rather, current evidence<sup>7</sup> suggests that it was mediated by the overall climatic changes recorded for the period, which commenced at approximately 4.6 ka cal BP.

### Supplementary Note 4: Manuring and pre-domesticated cereals

The high  $\delta^{15}\text{N}$  values obtained from 'pre-domesticated' grains may reflect some form of manuring, either as construed in the 'dump heap' theory of early cultivation<sup>8</sup> or in view of claims from early sites like Abu Hureyra that some of the background flora was derived from herbivore dung collected and burned as fuel<sup>9</sup>.

### Supplementary Note 5: Demography and cereal cultivation

A trend towards cereal-based farming during the Neolithic, associated with a decrease in the diversity of wild flora, has been reported for Tell Halula<sup>10</sup> (one of the Neolithic sites included in this study). This trend was accompanied by a growth in population during the earliest phases of the settlement (10.2 – 9.0 ka cal BP), probably enhanced by more favourable environmental conditions<sup>2,11,12</sup>. A decline in population followed in the late phases (9.0 – 7.4 cal BP) perhaps as a consequence of exceeding the capacity of the agroecosystem, including scarcity of cultivable land

within a manageable distance from the site together with the occurrence of the '8.2 ka event'<sup>13</sup>. Moreover, the possible expansion of the area dedicated to agriculture would have been necessarily devoted to extensive crops requiring relatively low labour efforts, such as cereals<sup>14,15</sup>. In the case of Tell Halula this hypothesis is partly confirmed by a significant reduction in legume cultivation from PPNB to PN<sup>10</sup>. Furthermore, an expansion of cultivated area would force the use of less fertile soils as readily cultivable patches became less abundant. This may explain the reduction in cereal yields from PPNB to PN, as estimated from the carbon isotope composition of charred kernels.

#### Supplementary Note 6: Environmental versus evolutionary changes in seed size.

Seed size changes in domesticated cereals was in its long-term development related to an evolutionary process<sup>16</sup>, while short-term fluctuations were most likely linked to the prevailing environmental conditions. This is in agreement with archaeobotanical evidence from northern Mesopotamian sites reporting e.g. a seed size decrease at Tell Hadidi and Tell Sabi Abyad between the Middle and Late Bronze Age<sup>17</sup>.

#### Supplementary Note 7: Effect of breeding on kernel weight

Attempting to increase grain yield in breeding programs by simply choosing lines carrying heavier grains has proved mostly ineffective. For example, a complete compensation between the number of kernels and kernel weight has been reported after eight cycles of selecting heavier grain lines without any improvement in grain yield<sup>18</sup>. Average kernel weight is a more conservative attribute



than kernel number<sup>19-21</sup>. Kernel weight has not been markedly modified by wheat breeding during the past century<sup>22,23</sup>, including Mediterranean wheat<sup>24-28</sup>, and some results have even shown that individual kernel weight was reduced by genetic improvement<sup>29,30</sup>.

#### Supplementary Note 8: Climate change and social disturbances

For example, an arid event around 8,200 years ago (termed the '8.2 ka event') is sometimes linked with the abandonment of early (Pre-Pottery Neolithic) farming settlements in the Southern Levant<sup>31,32</sup>. In addition, a dry period that is detectable in several climate proxies around 4.2 ka cal PB (the so called '4.2 ka event') and is thought to have lasted for about 300 years has often been related to cultural collapse, for example the breakdown of the Akkadian empire<sup>31-34</sup>. In any case, Neolithic sites in the region had started to decline in terms of demography prior to the dry '8.2 ka event' that marked their abandonment. This has been reported for both major settlements such as Abu Hureyra with thousands of people<sup>10</sup>, and medium-small settlements of hundreds of individuals like Tell Halula<sup>8</sup>. One reason for the decline in population may have been a reduction in the carrying capacity of the basic agricultural system, namely cereal farming<sup>11</sup>.

## References

1. Riehl, S., Bryson, R. & Pustovoytov, K. Changing growing conditions for crops during the Near Eastern Bronze Age (3000 - 1200 BC): the stable carbon isotope evidence. *J. Archaeol. Sci.* **35**, 1011–1022 (2008).
2. Riehl, S. Climate and agriculture in the ancient Near East: a synthesis of the archaeobotanical and stable carbon isotope evidence. *Veget. Hist. Archaeobot.* **17**(Suppl 1), S43–S51 (2008).
3. Riehl, S. Archaeobotanical evidence for the interrelationship of agricultural decision-making and climate change in the ancient Near East. *Quatern. Int.* **197**, 93–114 (2009).
4. Fiorentino, G., Caracuta, V., Calcagnile, L., D’Elia, M., Matthiae, P., Mavelli, F. & Quarta, G. Third millennium B.C. climate change in Syria highlighted by carbon stable isotope analysis of <sup>14</sup>C-AMS dated plant remains from Ebla. *Palaeogeogr. Palaeoclimatol. Palaeoecol.* **266**, 51–58 (2008).
5. Roberts, N., Eastwood, W.J., Kuzucuoğlu, C., Fiorentino, G. & Caracuta, V. Climatic, vegetation and cultural change in the eastern Mediterranean during the mid-Holocene environmental transition. *Holocene* **21**, 147–162 (2011).
6. Masi, A., Sadori, L., Baneschi, I., Siani, A.M. & Zanchetta, G. Stable isotope analysis of archaeological oak charcoal from eastern Anatolia as a marker of mid-Holocene climate change. *Plant Biol.* **15**, Supplement s1, 83-92 (2013).
7. Finné, M., Holmgren, K., Sundqvist, H.S., Weiberg, E. & Lindblom, M. Climate in the eastern Mediterranean, and adjacent regions, during the past 6000 years - A review. *J. Archaeol. Sci.* **38**, 3153-3173 (2011).
8. Blumler, M.A., Byrne, R., Belfer-Cohen, A., Mck. Bird, R., Bohrer, V.L., Byrd, B.F., Dunnell, R.C., Hillman, G., Moore, A.M.T., Olszewski, D.I., Redding, R.W. & Riley, T.J. The ecological genetics of domestication and the origins of agriculture. *Current Anthropol.* **32**, 23-54 (1991).

9. Miller, N.F. Seed eaters of the ancient Near East: human or herbivore? *Current Anthropol.* **37**, 521-528 (1996).
10. Ferrio, J.P., Arab, G., Buxo, R., Emma, G., Molist, M., Voltas, J. & Araus, J.L. Agricultural expansion and settlement economy in Tell Halula (Mid-Euphrates valley): a diachronic study from Early Neolithic to present. *J. Arid. Environ.* **86**, 104-112 (2012).
11. Ferrio, J.P., Voltas, J. & Araus, J.L. Global change and the origins of agriculture. In *Crop Stress Management and Global Climate Change* (eds Araus, J.L., & Slafer, G.A.) 1-14 (CABI publishing, 2011).
12. Willcox, G., Buxo, R. & Herveux, L. Late Pleistocene and early Holocene climate and the beginnings of cultivation in northern Syria. *Holocene* **19**, 151–158 (2009).
13. Murphy, D.J. *People, plants & genes. The story of crops and humanity.* (Oxford University Press Inc., 2007).
14. Hillman, G.C. Agricultural resources and settlement in the Asvan region. *Anatolian Studies* **22**, 217-224 (1973).
15. Wilkinson, T.J. The structure and dynamics of dry-farming states in Upper Mesopotamia. *Current Antropol.* **35**, 483-520 (1994).
16. Willcox, G. Measuring grain size and identifying Near Eastern cereal domestication: evidence from the Euphrates valley. *J. Archaeol. Sci.* **31**, 145-150 (2004).
17. Zeist, W. van. Some notes on second millennium BC plant cultivation in the Syrian Jazira. In *Cinquante-deux reflexions sur le Proche-Orient offertes en hommage à Léon Meyer* (eds Gasche, H. & Tanret, M.) 541-552 (Peeters, Leuven, 1994).
18. Wiersma, J.J., Busch, R.H., Fulcher, G.G., Hareland, G.A. Recurrent selection for kernel weight in spring wheat. *Crop Sci.* **41**, 999–1005 (2011).
19. Fischer, R.A. Number of kernels in wheat crops and the influence of solar radiation and temperature. *J. Agric. Sci.* **105**, 447–461 (1985).

20. Savin, R. & Slafer, G.A. Shading effects on the yield of an Argentinian wheat cultivar. *J Agric. Sci.* **116**, 1-7 (1991).
21. Sadras, V.O. & Slafer, G.A. Environmental modulation of yield components in cereals: Heritabilities reveal a hierarchy of phenotypic plasticities. *Field Crop Res.* **127**, 215–224 (2012).
22. Austin, R.B., Ford, M.A. & Morgan, C.L. Genetic improvement in the yield of winter wheat: a further evaluation. *J. Agric. Sci.* **112**, 295-301 (1989).
23. Waddington, S.R., Ransom, J.K., Osmanzai, M. & Saunders, D.A. Improvement in the yield potential of bread wheat adapted to Northwest Mexico. *Crop Sci.* **26**, 698-703 (1986).
24. Royo, C., Álvaro, F., Martos, V., Ramdani, A., Isidro, J., Villegas, D. & García del Moral, L.F. Genetic changes in durum wheat yield components and associated traits in Italian and Spanish varieties during the 20<sup>th</sup> century. *Euphytica* **155**, 259-270 (2007).
25. Sánchez-García, M., Royo, C., Aparicio, N., Martín-Sánchez, J.A. & Álvaro, F. Genetic improvement of bread wheat yield and associated traits in Spain during the 20<sup>th</sup> century. *J. Agric. Sci.* **151**, 105–118 (2013).
26. Loss, S.P., Kirby, E.J.M., Siddique, K.H.M. & Perry, M.W. Grain growth and development of old and modern Australian wheats. *Field Crops Res.* **21**, 131-146 (1989).
27. Araus, J.L., Ferrio, J.P., Buxo, R. & Voltas, J. The historical perspective of dryland agriculture: Lessons learned from 10,000 years of wheat cultivation. *J. Exp. Bot.* **58**, 131-145 (2007).
28. Araus, J.L., Cabrera-Bosquet, L., Serret, M.D., Bort, J. & Nieto-Taladriz, M.T. Comparative performance of  $\delta^{13}\text{C}$ ,  $\delta^{18}\text{O}$  and  $\delta^{15}\text{N}$  for phenotyping durum wheat adaptation to a dryland environment. *Funct. Plant Biol.* **40**, 595-608 (2013).

29. Guarda, G., Padovan, S. & Delogu, G. Grain yield, nitrogen-use efficiency and baking quality of old and modern Italian bread-wheat cultivars grown at different nitrogen levels. *Eur. J. Agron.* **21**, 181–192 (2004).
30. Del Pozo, A, Matus, I, Serret, M.D. & Araus, J.L. Agronomic and physiological traits associated with the breeding advance of Chilean wheats under high-productive Mediterranean conditions. *Environ. Exp. Bot.* (in press) (2014).
31. Migowski, C., Stein, M., Prasad, S., Negendank, J.F.W. & Agnon, A. Holocene climate variability and cultural evolution in the Near East from the Dead Sea sedimentary record. *Quat. Res.* **66**, 421–431 (2006).
32. Staubwasser, M. & Weiss, H. Holocene climate and cultural evolution in late prehistoric-early historic West Asia. *Quat. Res.* **66**, 372–387 (2006).
33. Weiss, H., Courty, M-A., Wetterstrom, W., Guichard, F., Senior, L., Meadow, R. & Curnow, A. The genesis and collapse of third millennium North Mesopotamian civilization. *Science* **261**, 995–1004 (1993).
34. deMenocal, P.B. Cultural responses to climate change during the Late Holocene. *Science* **292**, 667–673 (2001).
